# Supplementary material
Source: PubMed Central journal article supplement (PMC1800710)
Supplement: molcellb_27_4_1442__1.pdf [file molcellb_27_4_1442__1.pdf]

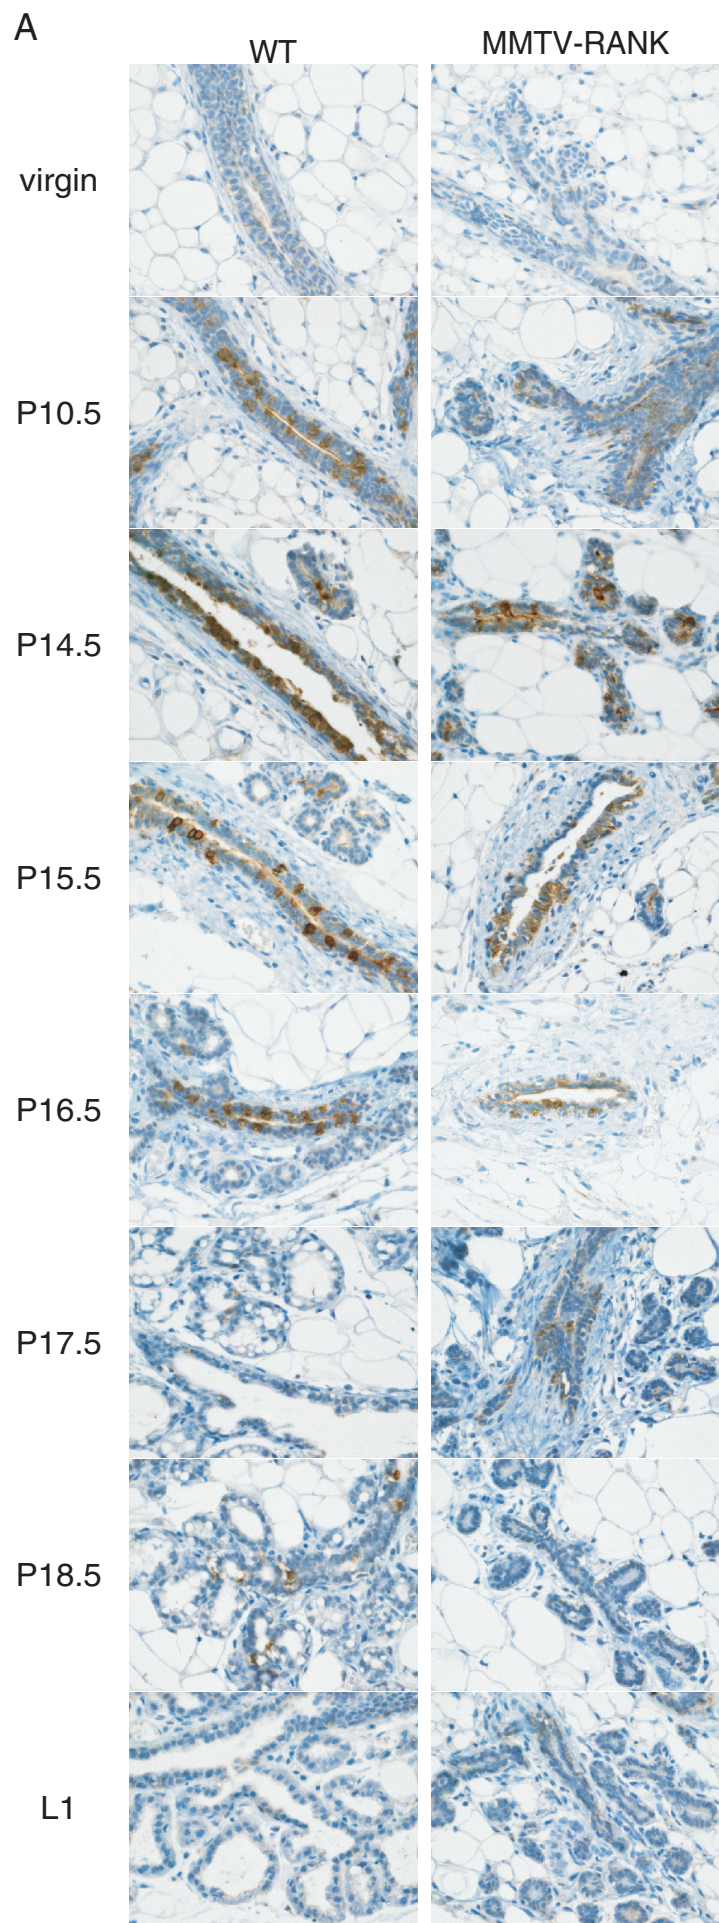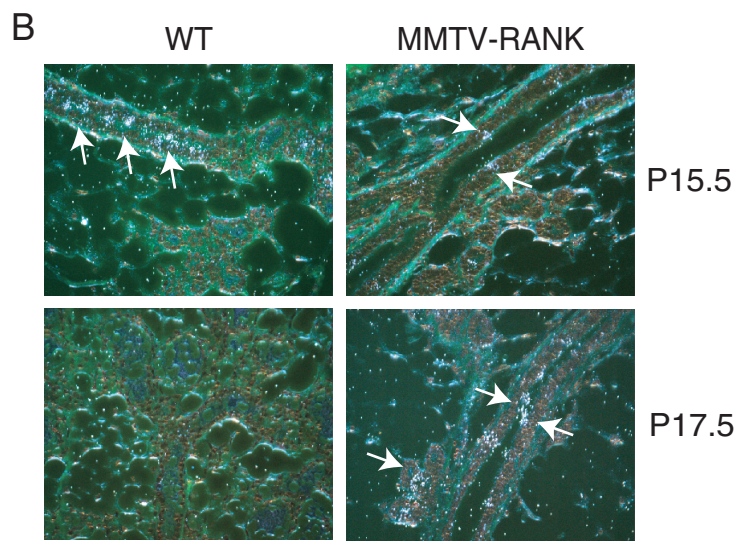

## Figure legend for Supplementary Figure S1

**Fig. S1:** RANKL expression predominantly colocalizes with ductal cells lining the lumen in WT and MMTV-RANK mammary glands. **(A)** RANKL IHC in WT and MMTV-RANK mammary glands from virgin and pregnant mice at P10.5, 14.5, 15.5, 16.5, 17.5, 18.5 and L1. Scale bar 100  $\mu\text{m}$ . **(B)** RANKL ISH in WT and MMTV-RANK mammary glands at P15.5 and P17.5. Arrows indicate areas of positive signal. Scale bar 100  $\mu\text{m}$ .
