# Supplementary material
Source: PubMed Central journal article supplement (PMC1800710)
Supplement: molcellb_27_4_1442__2.pdf [file molcellb_27_4_1442__2.pdf]

Gonzalez-Suarez\_Supplementary Figure S2

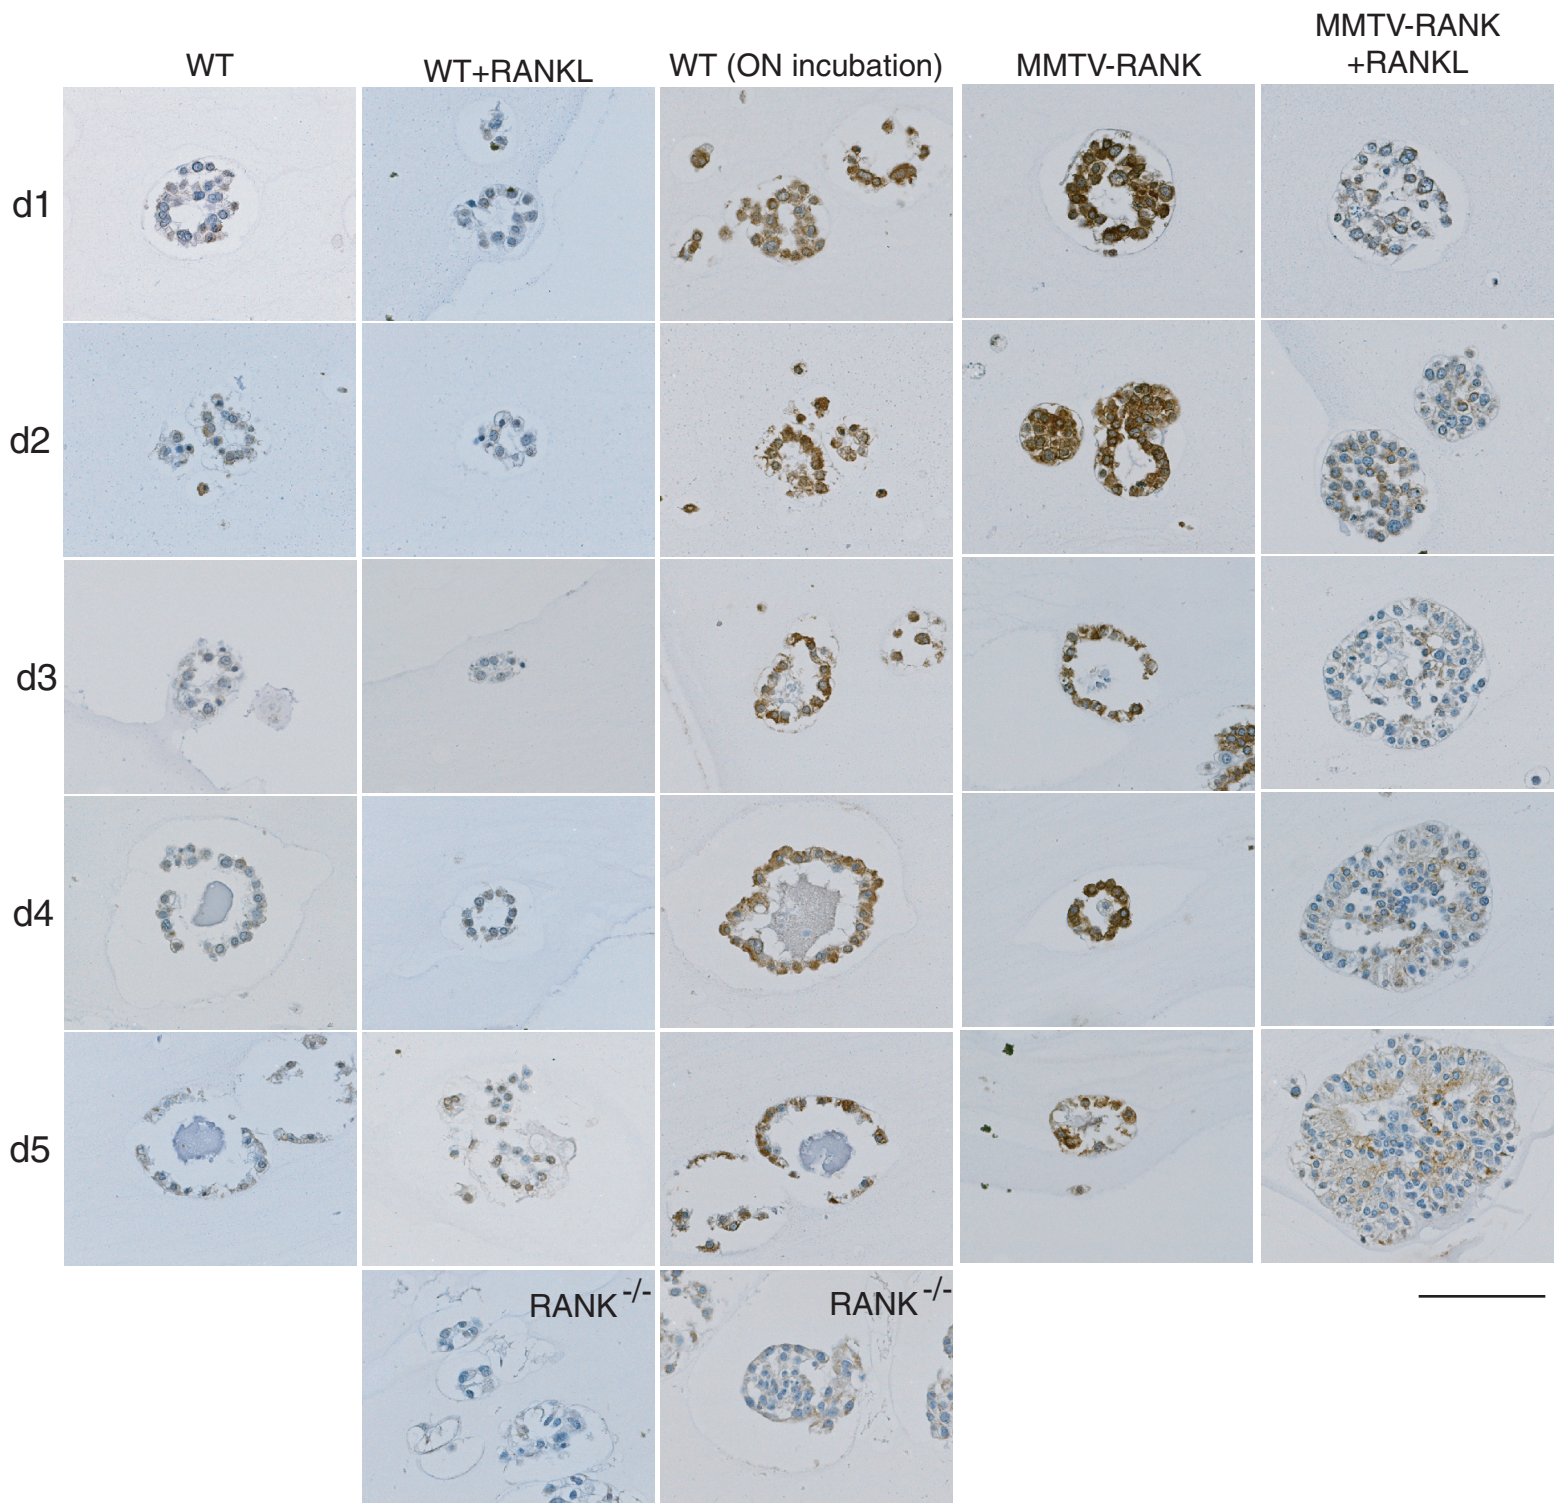

## Figure legend for Supplementary Figure S2

**Fig. S2:** RANK protein expression levels remain unchanged in WT and MMTV-RANK acini throughout the culture. RANK IHC in WT and MMTV-RANK acini cultured in differentiation media without or with RANKL. Representative pictures at days: 1, 2, 3, 4 and 5 are shown (d1, d2, d3, d4, d5). MECs cultures from five WT and six MMTV-RANK mice were analyzed. Acini from a RANK-null virgin female are included as a negative control. Antibody incubations were performed at (0.5  $\mu\text{g/ml}$ ) for 1h except otherwise noted (overnight incubation in a set of WT). Scale bar 100  $\mu\text{m}$ . Note the lack of secretory acini in WT and MMTV-RANK acini treated with RANKL.
