# Supplementary material
Source: PubMed Central journal article supplement (PMC1800710)
Supplement: molcellb_27_4_1442__3.pdf [file molcellb_27_4_1442__3.pdf]

Gonzalez-Suarez\_Supplementary Fig. S3

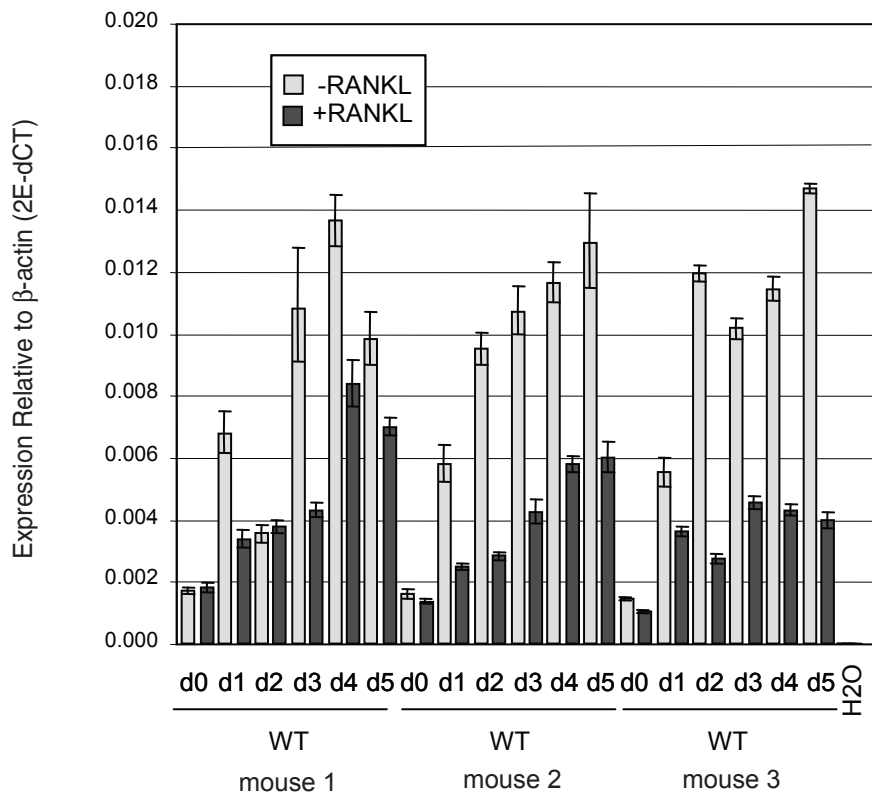

### **Figure legend for Supplementary Figure S3**

**Fig. S3:** RANK mRNA levels do not decrease in WT acini throughout the culture. RANK mRNA expression levels relative to  $\beta$ -actin in WT acinar cultures +/-RANKL at days: d0, d1, d2, d3, d4 and d5. Results from three independent WT cultures are shown. Amplifications were performed in triplicate and the standard deviation is shown. Note that lower levels of mRANK are detected in the presence of RANKL.
